# Supplementary material for: Structural engineering of robust titanium nitride as effective platinum support for the oxygen reduction reaction
Source: Royal Society of Chemistry journal article supplement (doi:10.1039/c8ta00326b), 2018-01-01
Supplement: c8ta00326b1.pdf [file c8ta00326b1.pdf]

## ***Electronic Supplementary Information***

### **Structure engineering of robust titanium nitride as effective platinum support for oxygen reduction reaction**

*Haoxiong Nan<sup>1</sup>, Dai Dang<sup>1\*</sup>, Xin Long Tian<sup>2\*</sup>*

*1. School of Chemical Engineering and Light Industry, Guangdong University of Technology, Guangzhou, Guangdong, 510006, China.*

*2. Key Laboratory of Material Chemistry for Energy Conversion and Storage (Ministry of Education), Hubei Key Laboratory of Material Chemistry and Service Failure, School of Chemistry and Chemical Engineering, Huazhong University of Science and Technology, 1037 Luoyu Road, Wuhan 430074, China*

\*Corresponding authors:

E-mail: dangdai@gdut.edu.cn (D. Dang)

E-mail: tianxl@hust.edu.cn (X.L. Tian)

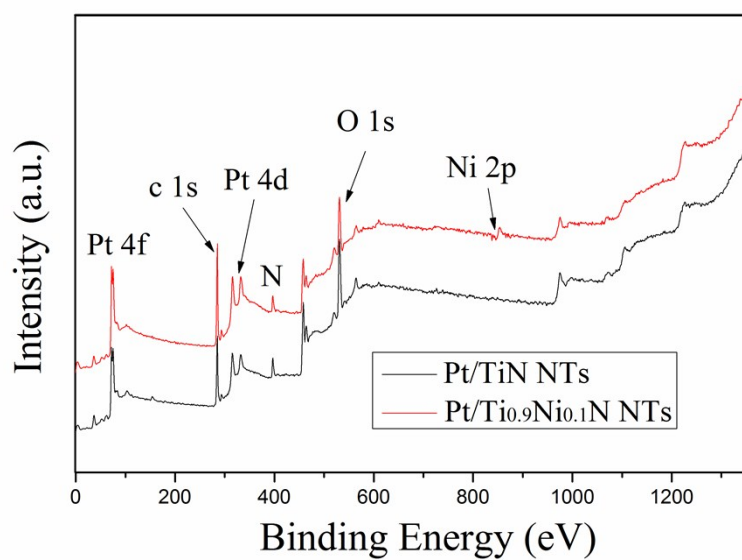

Figure S1. The XPS survey spectra of Pt/TiN and Pt/Ti<sub>0.9</sub>Ni<sub>0.1</sub>N NTs.

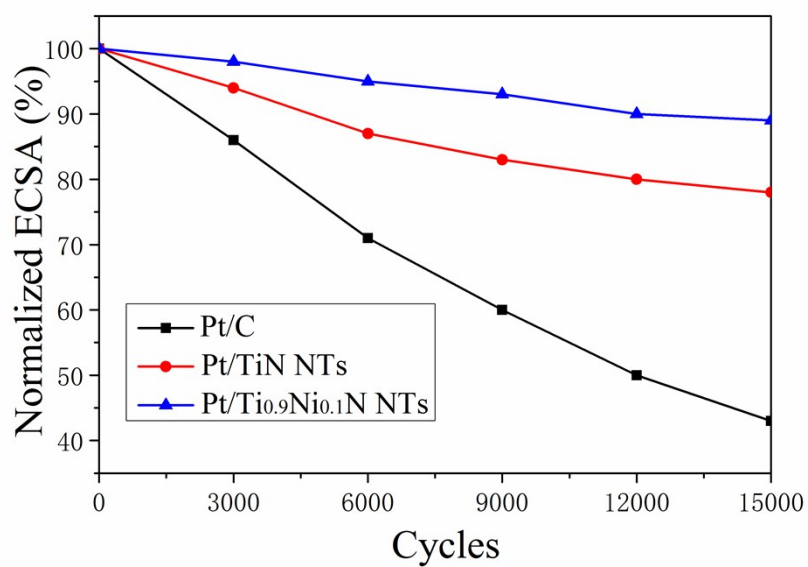

Figure S2. The ECSA evolution of the three catalysts with various cycling numbers.

Table S1. The half-wave potential, specific and mass activity values for ORR of the three catalysts

before and after ADT.

| catalyst                                 | Before the ADT          |                                        |                           | After the ADT           |                                        |                           |
|------------------------------------------|-------------------------|----------------------------------------|---------------------------|-------------------------|----------------------------------------|---------------------------|
|                                          | Half-wave potential (V) | MA (A mg <sub>Pt</sub> <sup>-1</sup> ) | SA (mA cm <sup>-2</sup> ) | Half-wave potential (V) | MA (A mg <sub>Pt</sub> <sup>-1</sup> ) | SA (mA cm <sup>-2</sup> ) |
| Pt/C                                     | 0.902                   | 0.22                                   | 0.53                      | 0.855                   | 0.09                                   | 0.16                      |
| Pt/TiN                                   | 0.914                   | 0.53                                   | 0.86                      | 0.894                   | 0.42                                   | 0.68                      |
| Pt/Ti <sub>0.9</sub> Ni <sub>0.1</sub> N | 0.930                   | 0.78                                   | 1.30                      | 0.921                   | 0.71                                   | 1.18                      |
